# Supplementary material for: TP5, a Peptide Inhibitor of Aberrant and Hyperactive CDK5/p25: A Novel Therapeutic Approach against Glioblastoma
Source: MDPI journal article supplement (doi:10.3390/cancers12071935), 2020-07-17

WB raw data

# Figure 1

CDK5

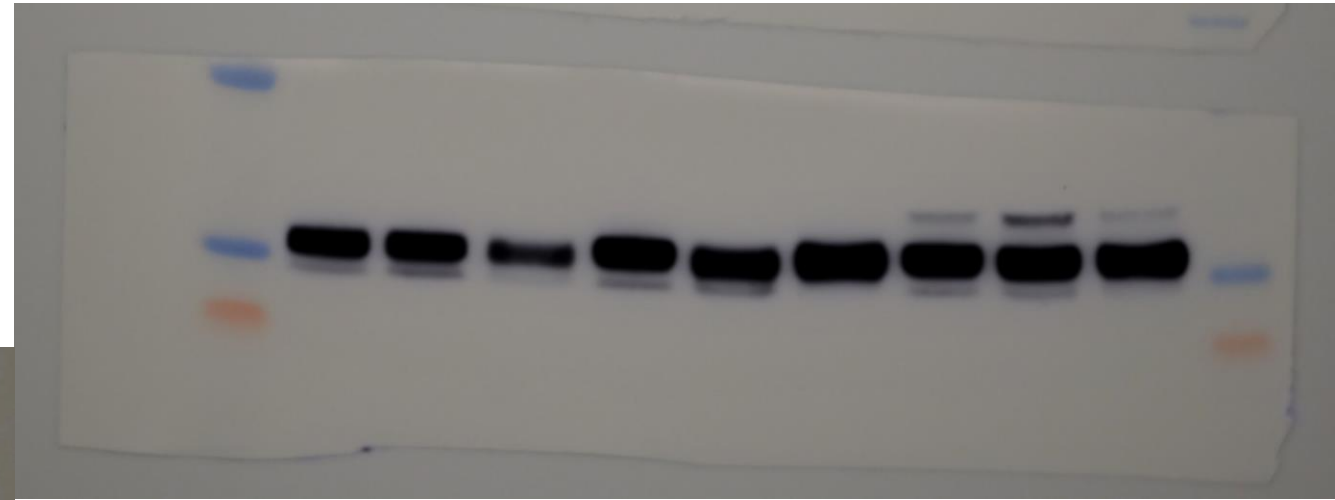

p35

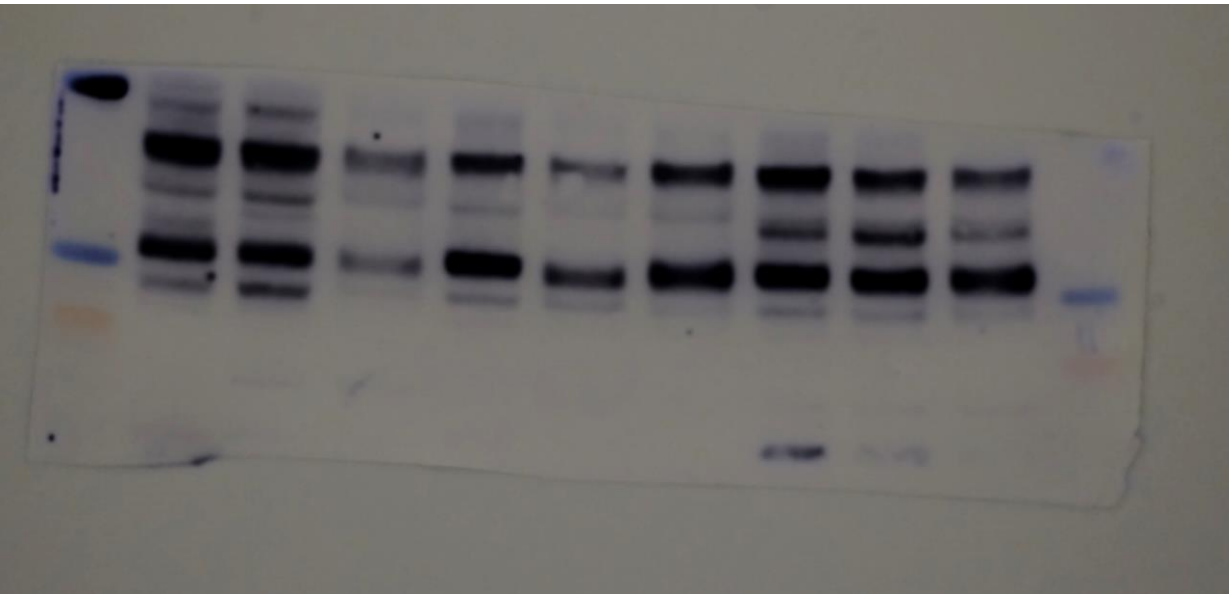

B - Actin

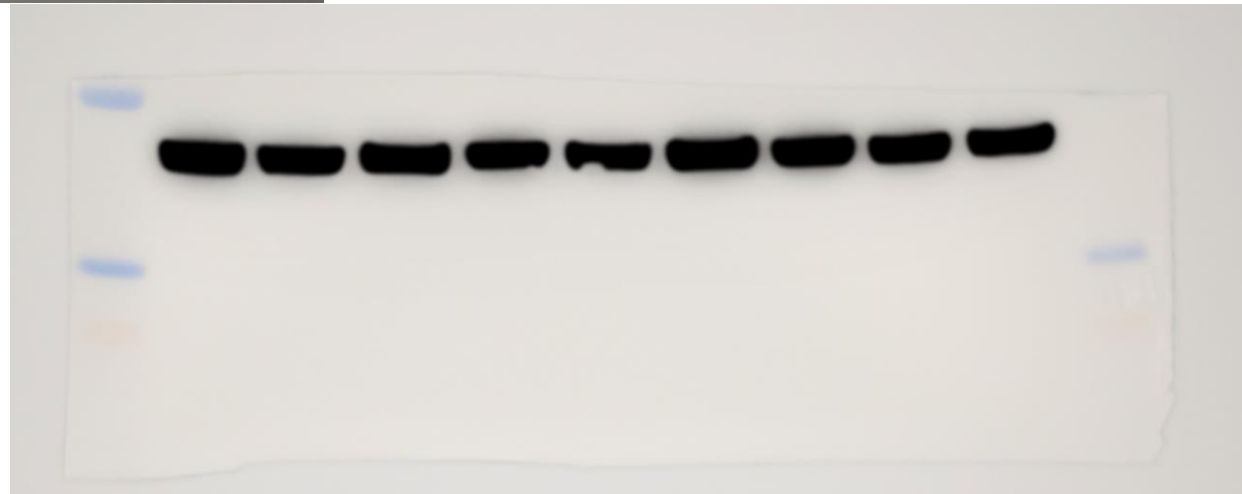

# Figure 1

CDK5

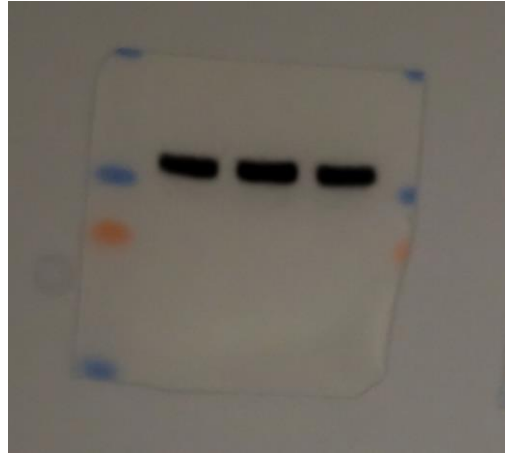

B - Actin

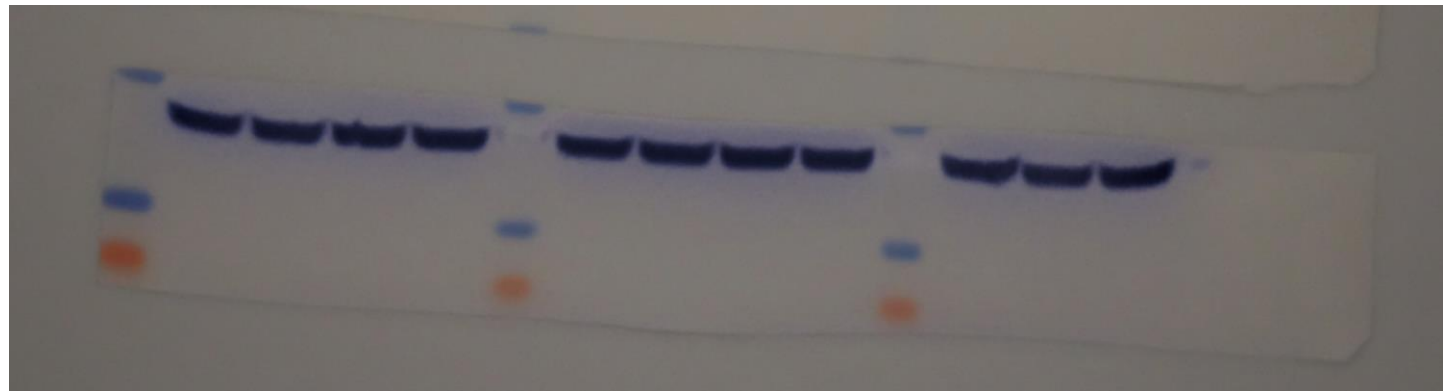

# Figure 1

p35

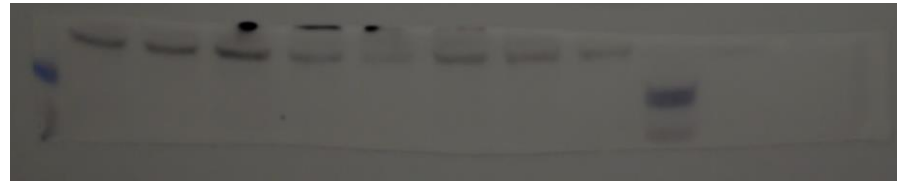

B - Actin

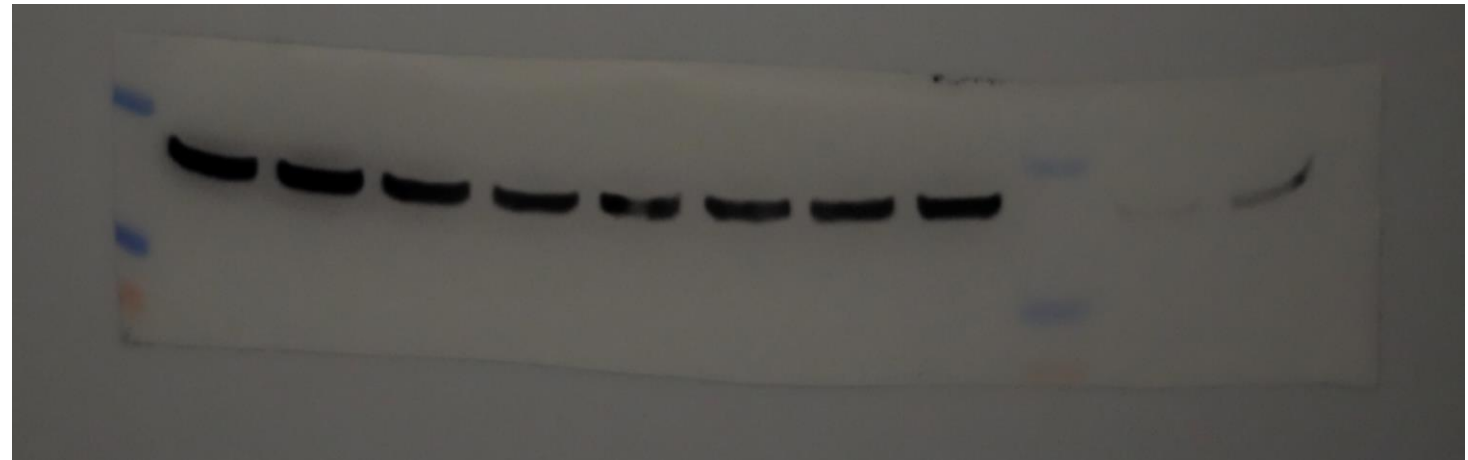

Figure 2

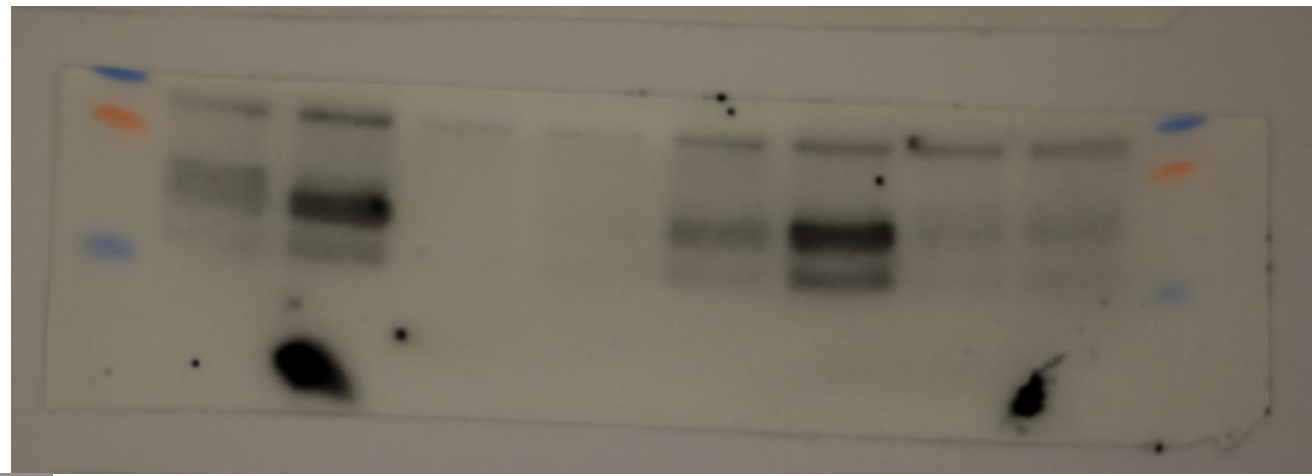

C-Caspase 3

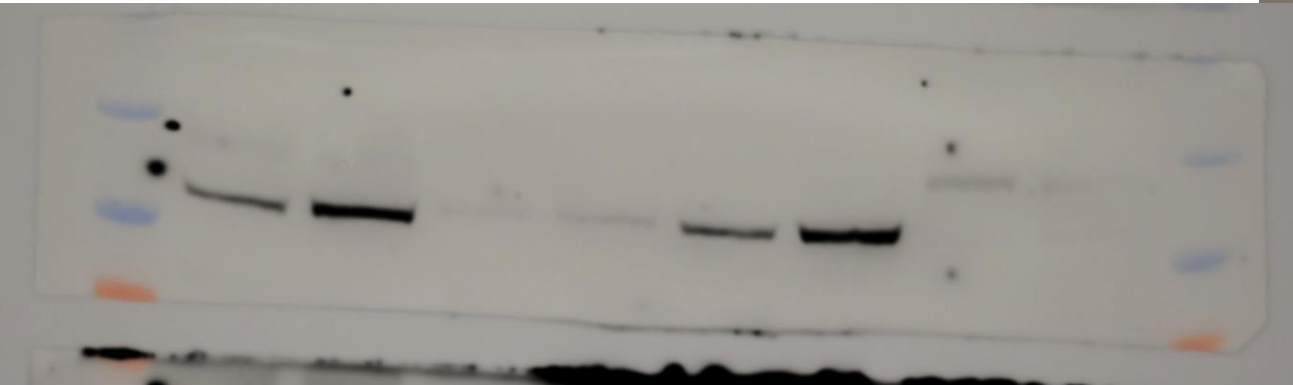

C-PARP

B - Actin

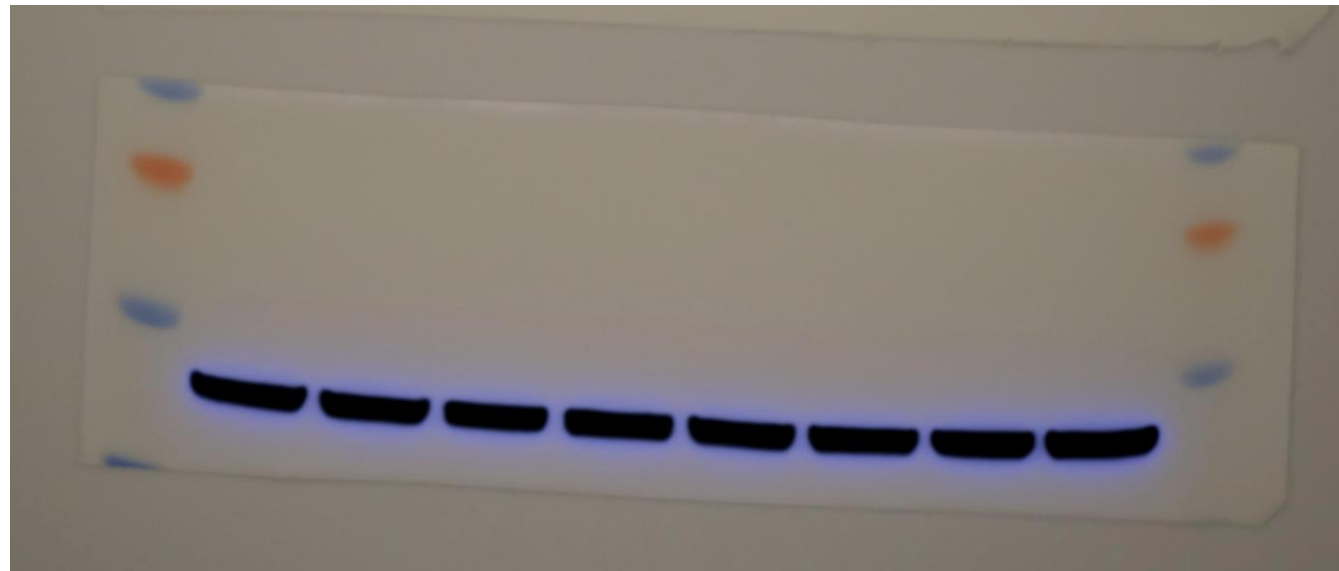

# Figure 2

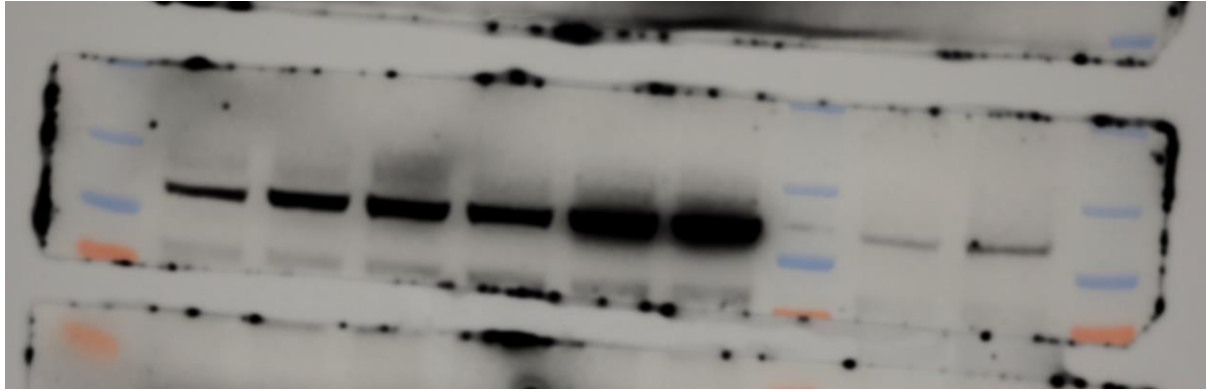

C-PARP

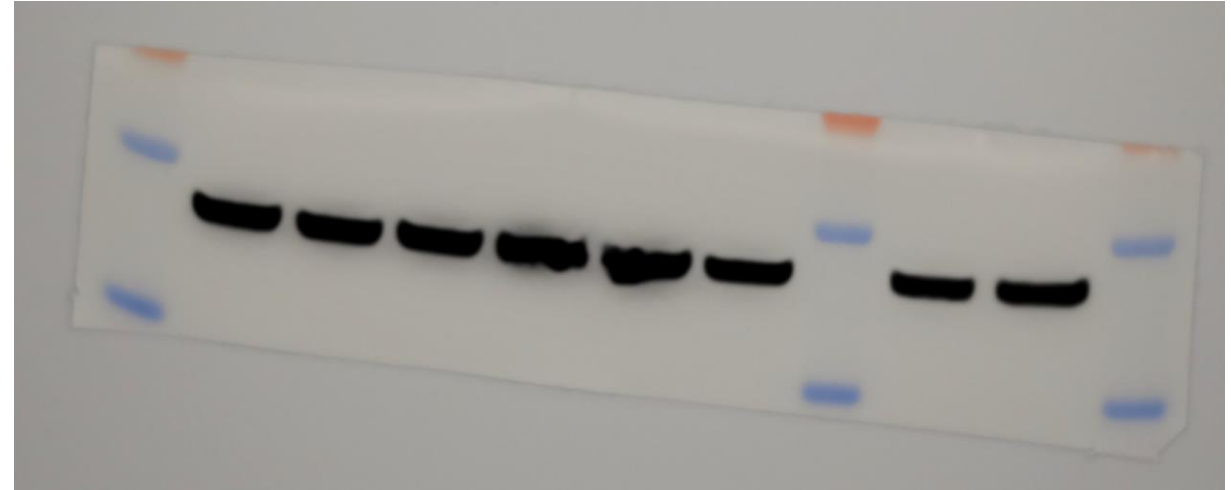

B - Actin

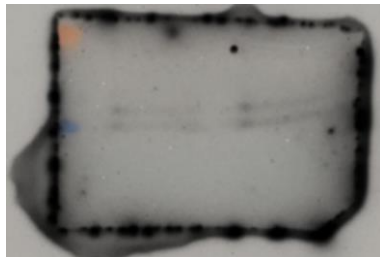

C-Caspase 3

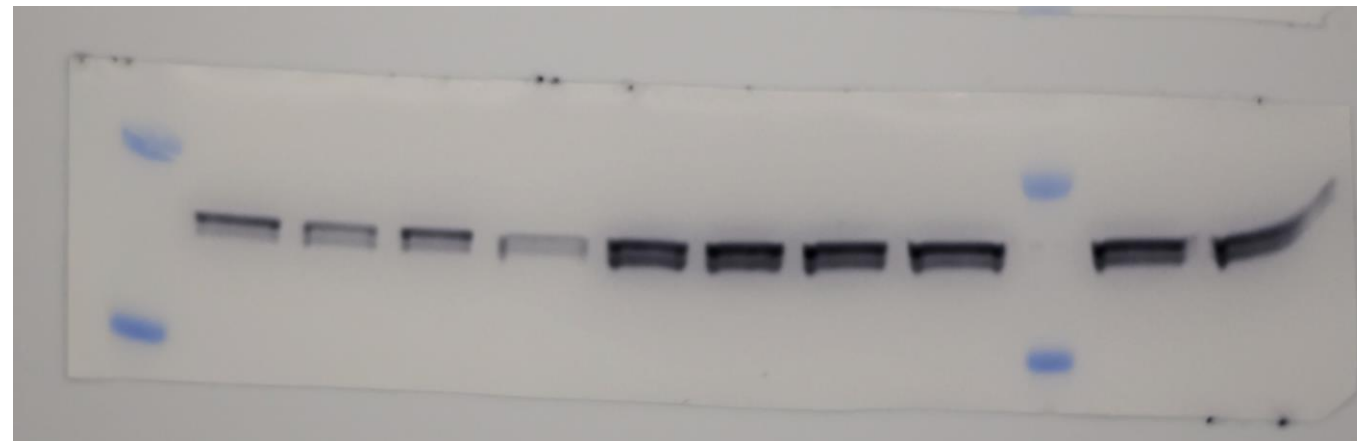

B - Actin

# Figure 3

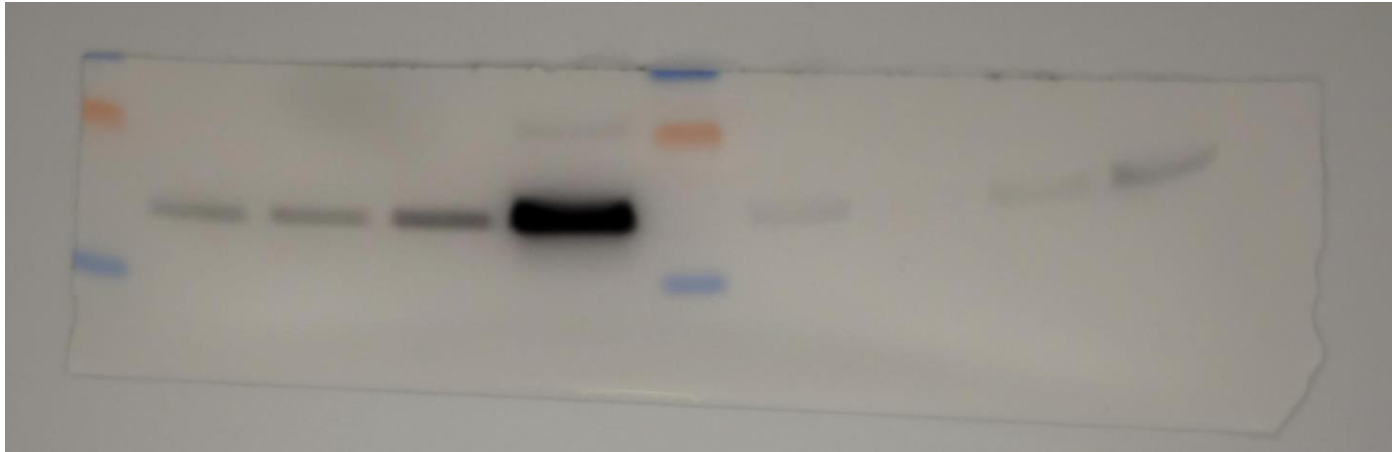

pH2AX

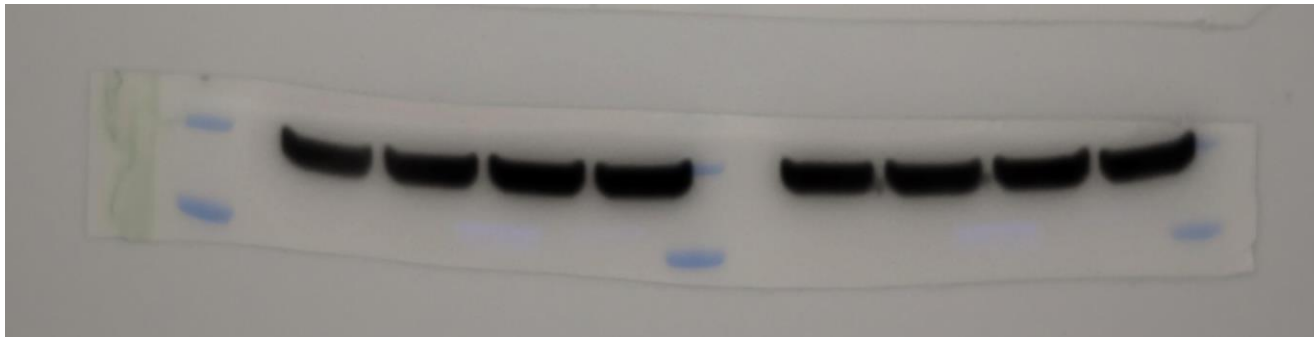

B - Actin

# Figure 3

pATM

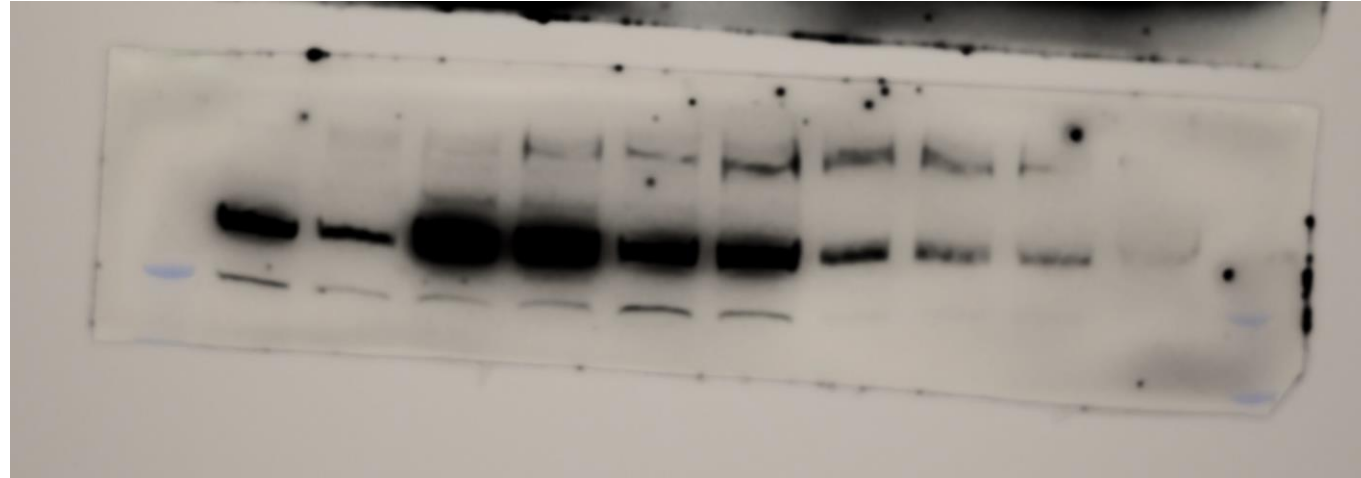

B - Actin

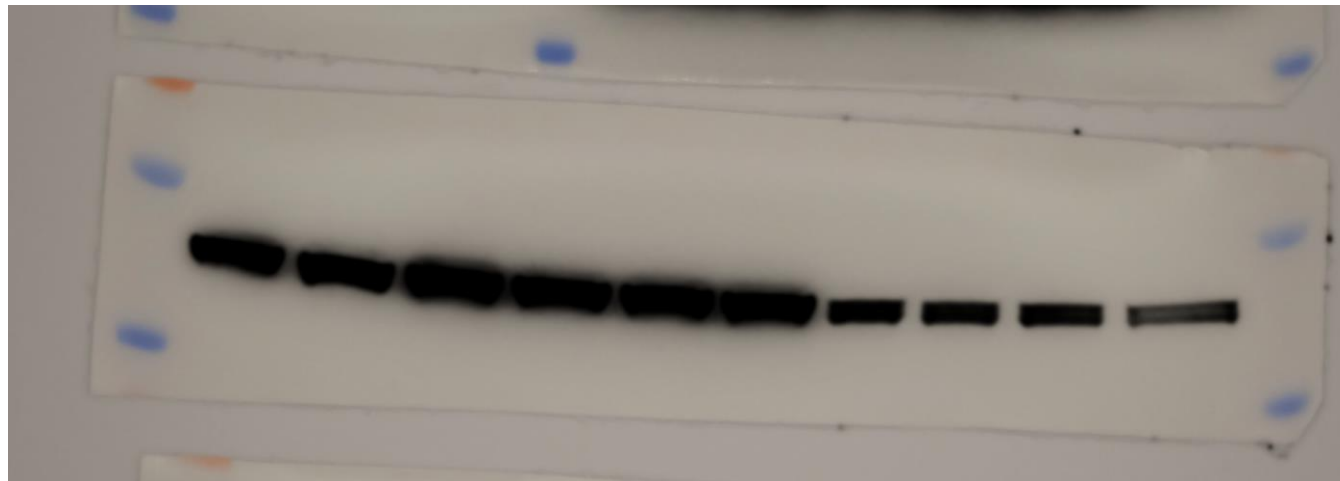



# Figure 3

pATM

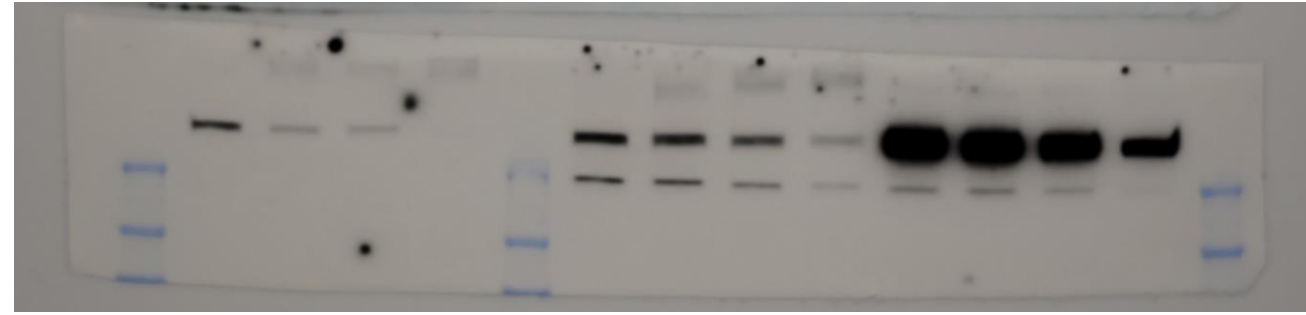

B - Actin

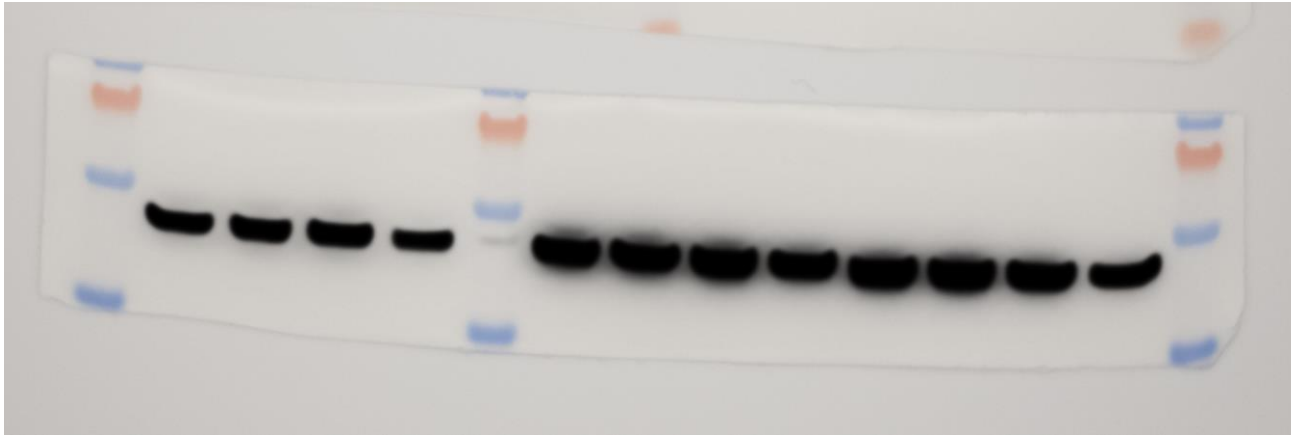

pH2AX

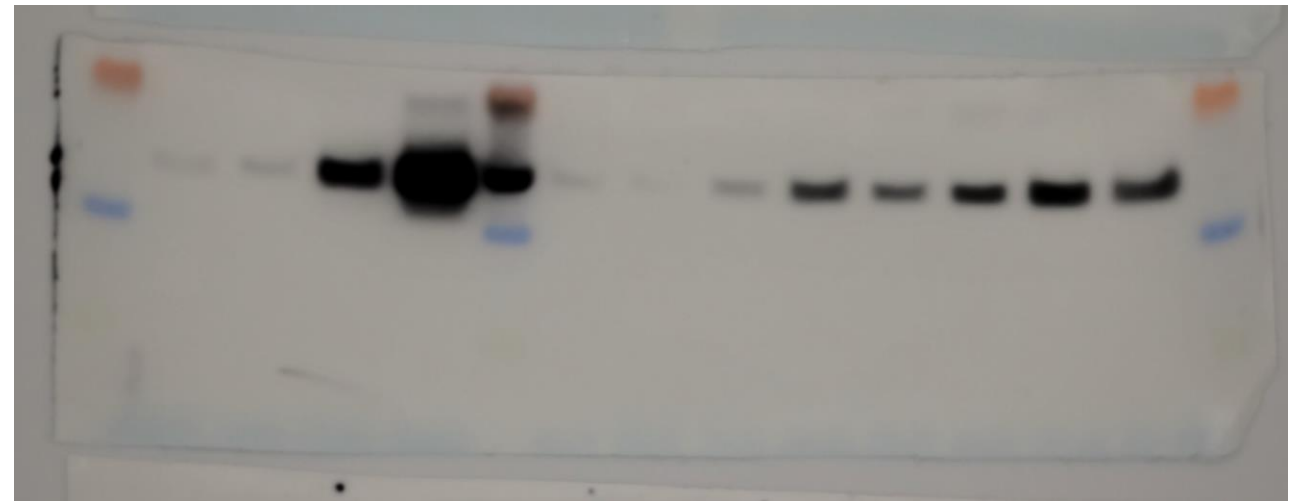

# Figure 4

pATM

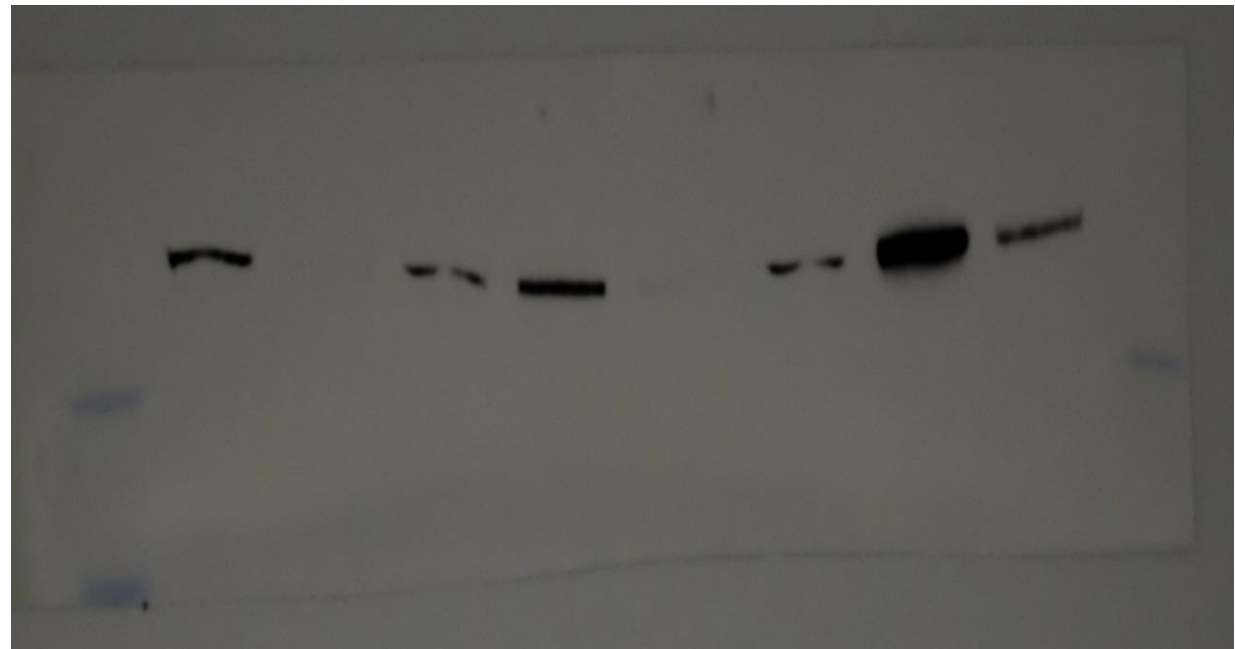

B - Actin

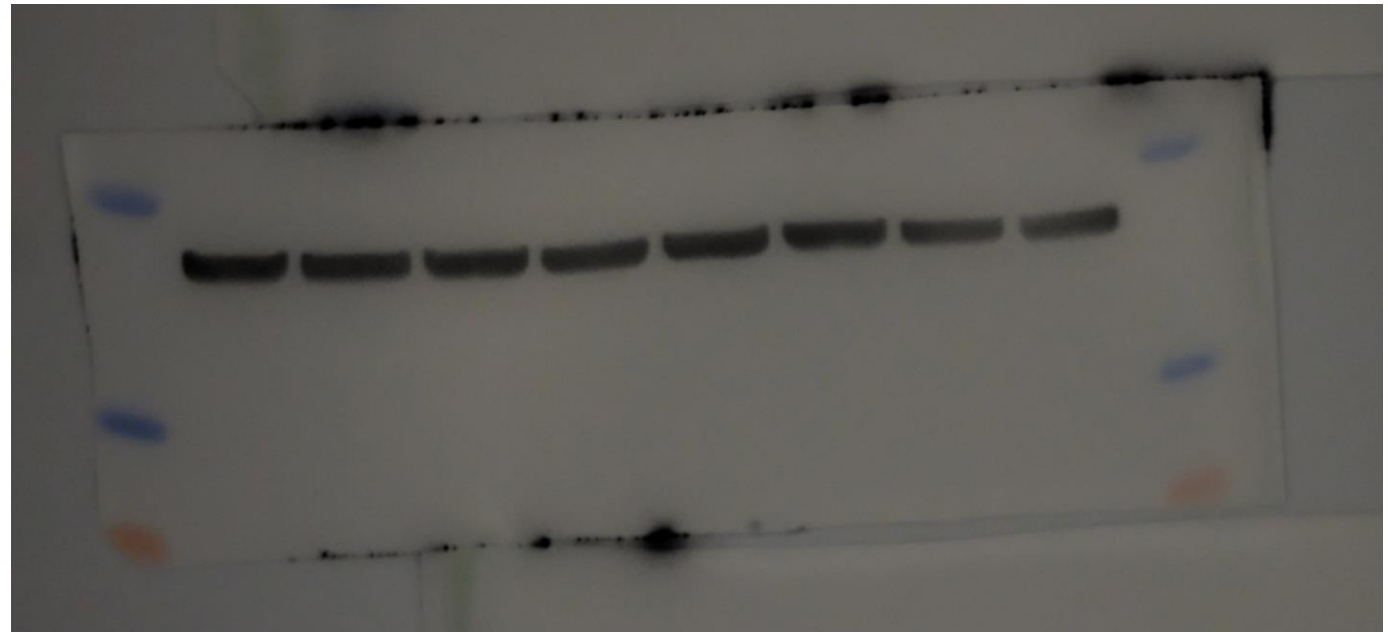

Figure 4

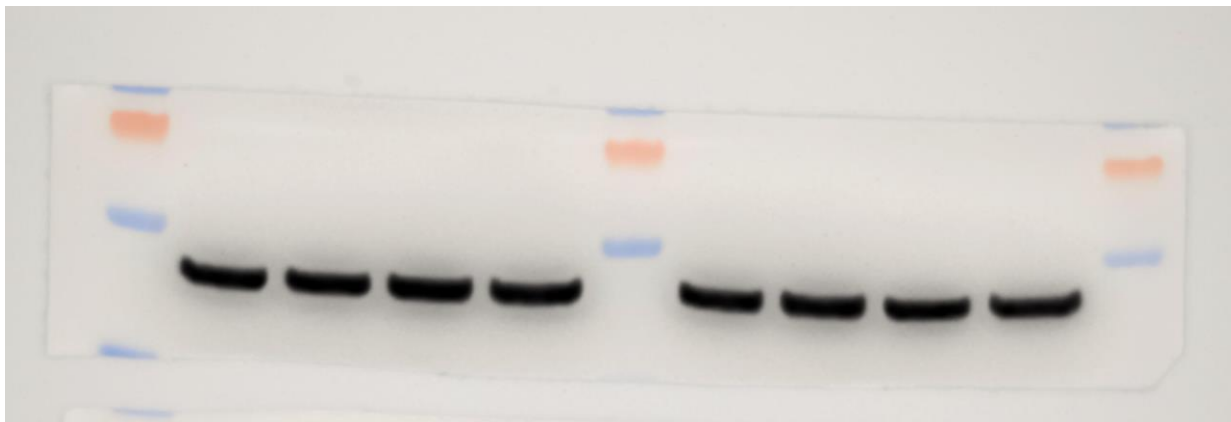

B - Actin

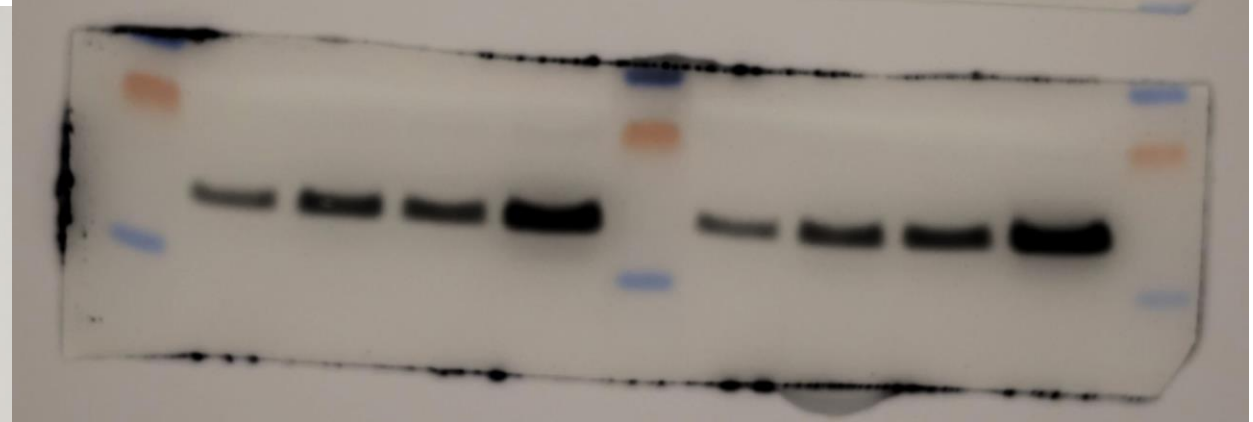

pH2AX

# Suppl. Fig 1



C-Caspase 3

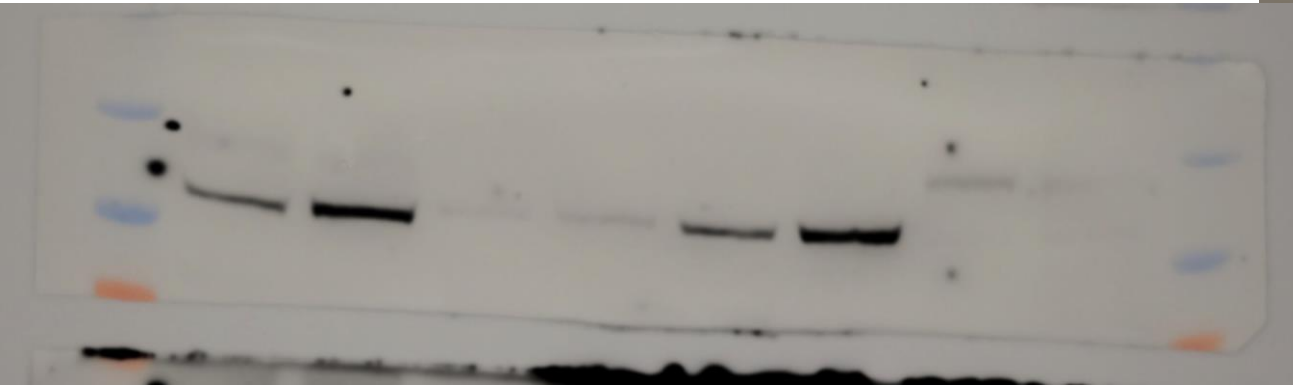

C-PARP

B - Actin



# Suppl. Fig 1

pATM

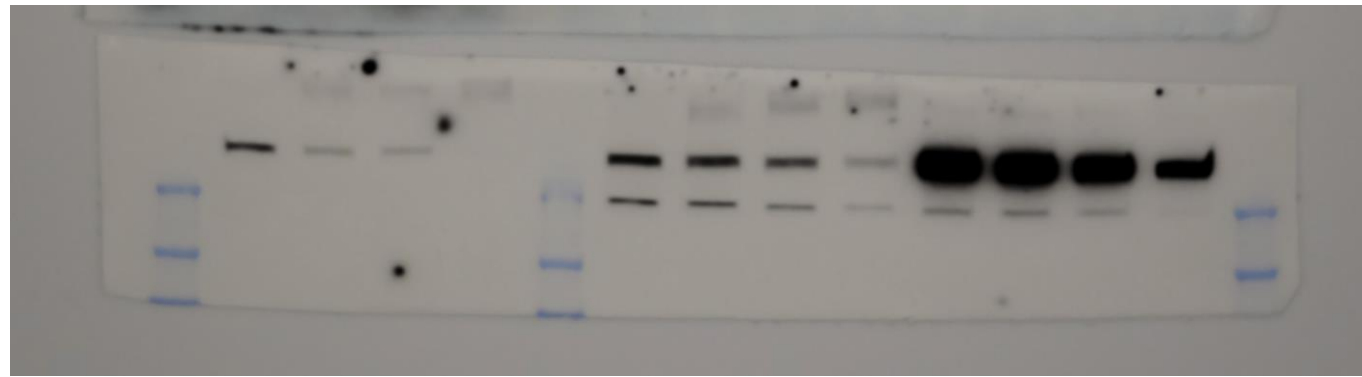

pH2AX

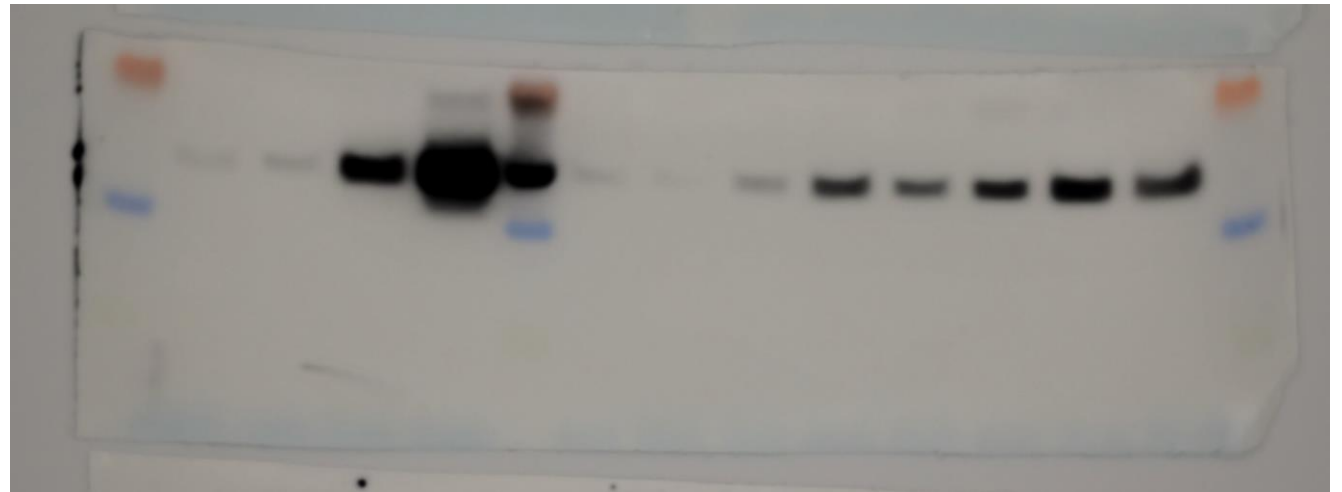

B - Actin

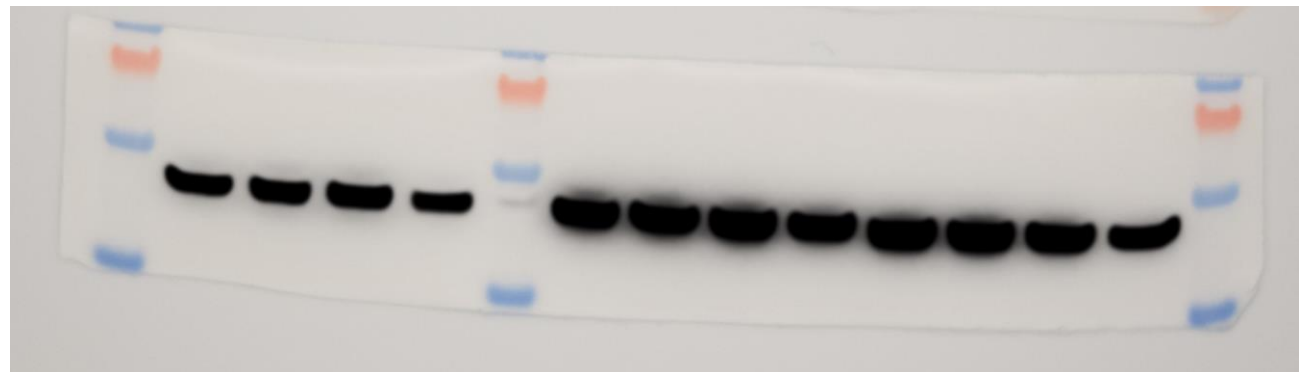

# Suppl. Fig 1

pATR

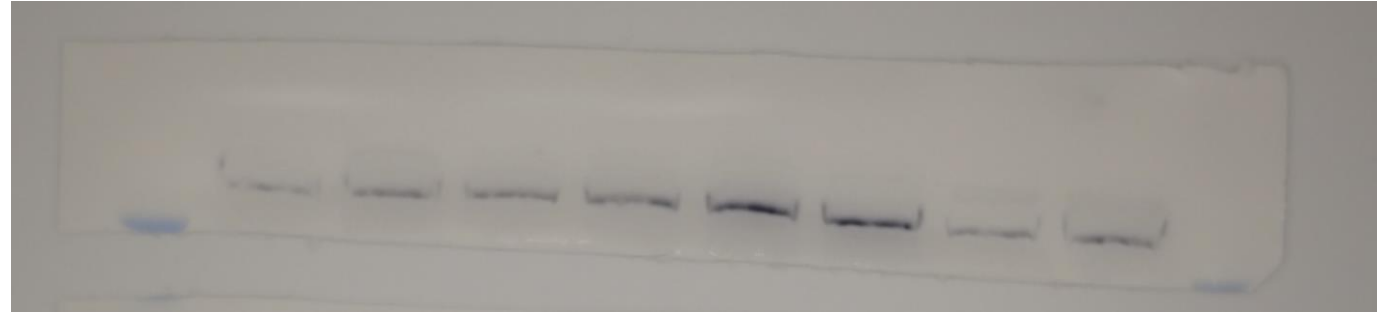

B - Actin

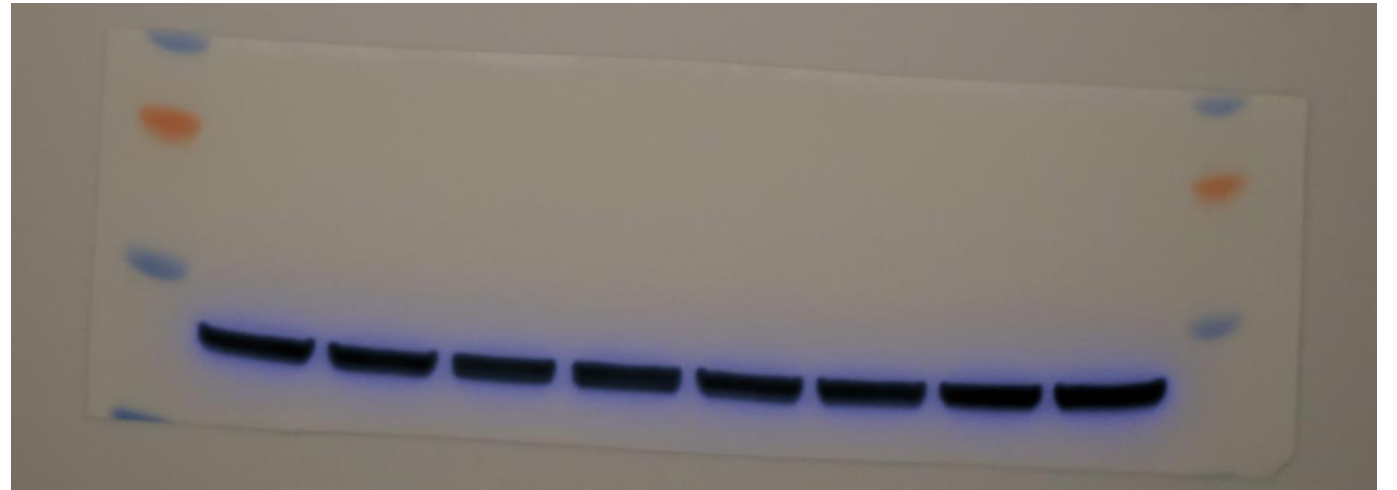

# Suppl. Fig 1

P-Chk1

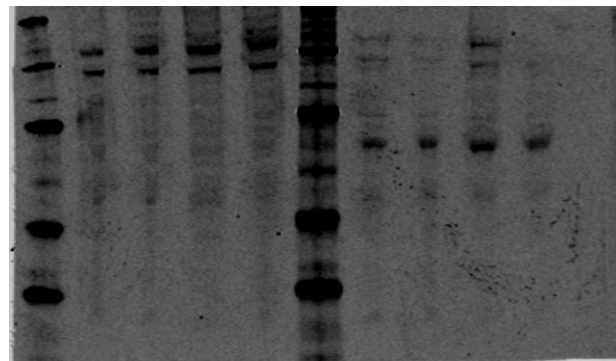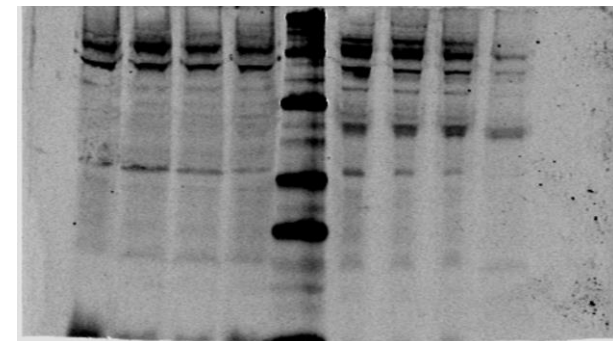

Chk1

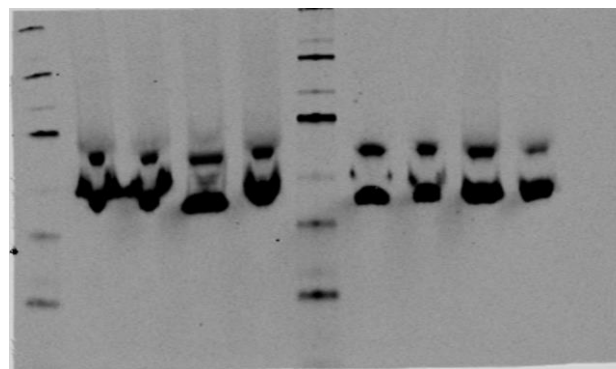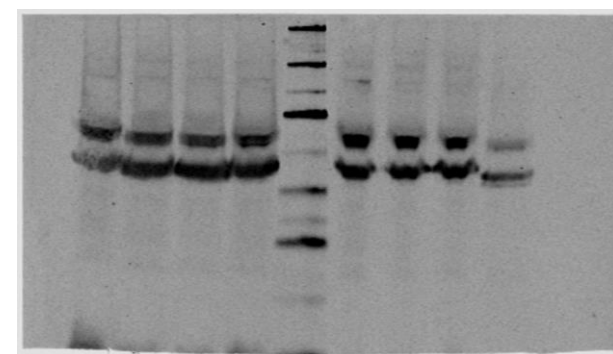

B-Actin

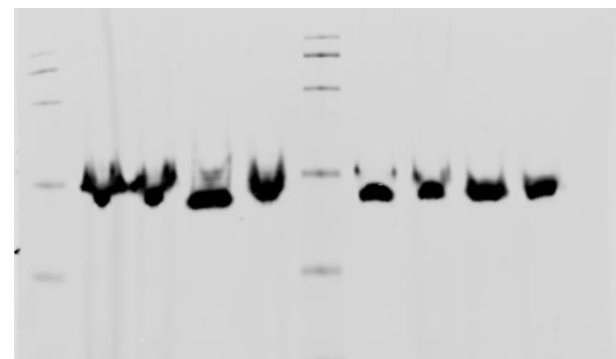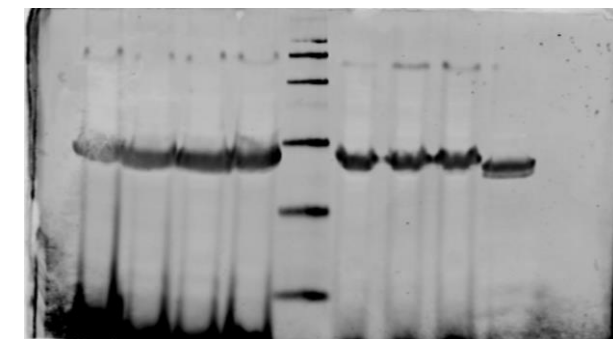

Suppl. Fig 2

pATM

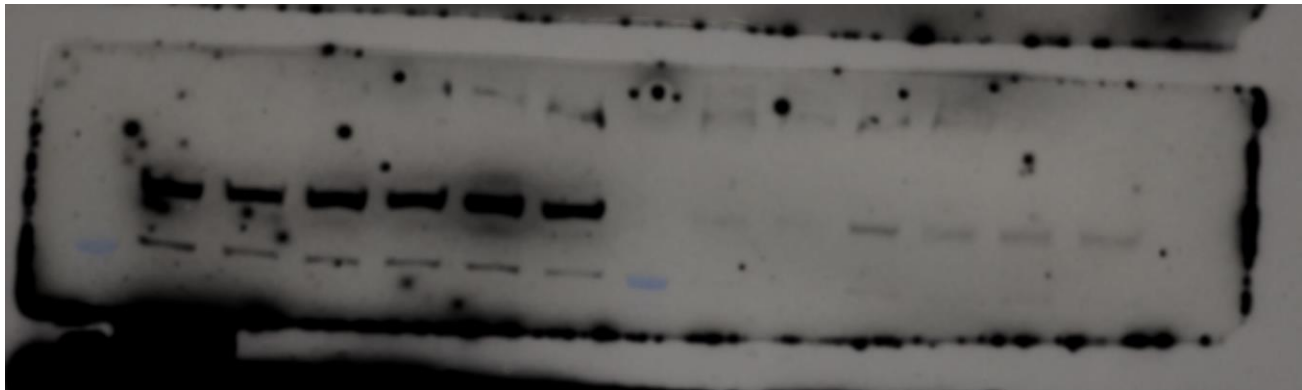

pH2AX

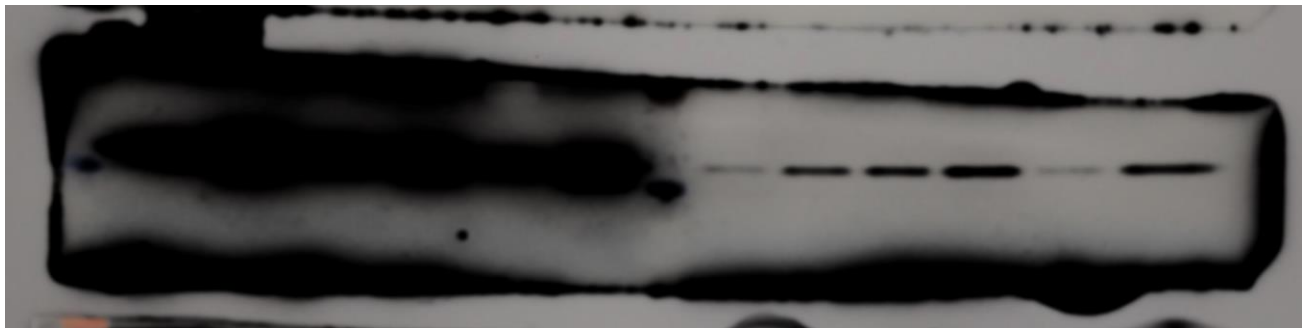

pH2AX

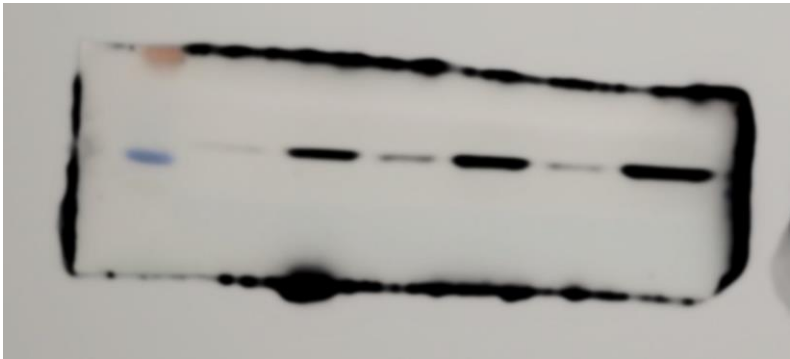

B - Actin

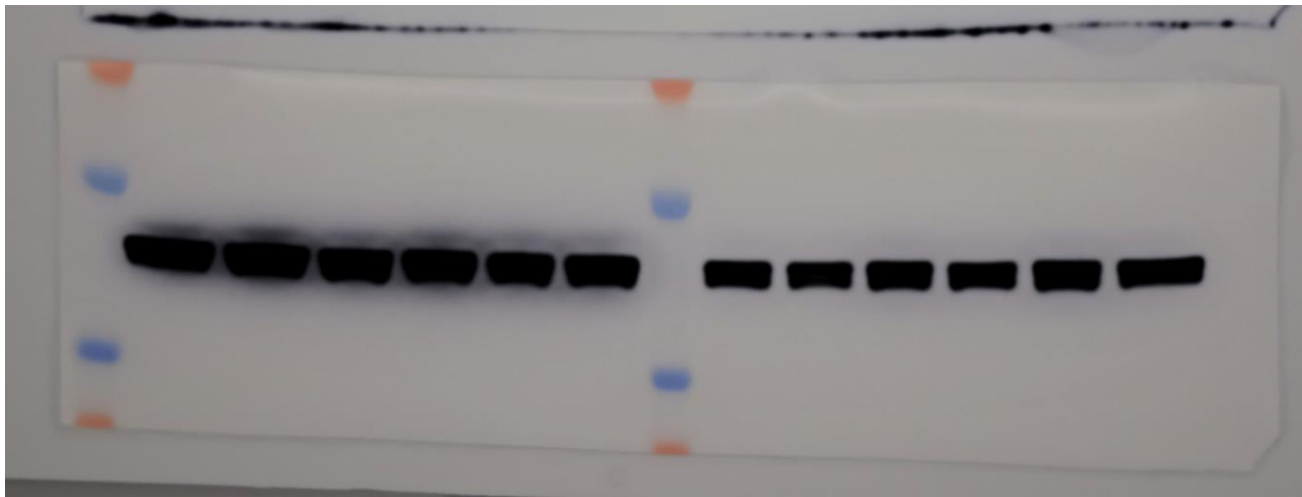

Supplement: s1 [file s1]
