# Supplementary material
Source: MDPI journal article supplement (https://www.mdpi.com/2072-6694/12/7/1935)
Supplement: s1 [file s1]

Archive with 2 entries (2 files):
- cancers-826148 WB.pdf
- cancers-826148-supplementary final--.pdf
